# Supplementary material
Source: PubMed Central journal article supplement (PMC4801270)
Supplement: pnas.1517056113.sd01.pdf [file pnas.1517056113.sd01.pdf]

# Dataset S1

Kopp et al.

**Dataset S1a. Proxy sites and original studies used in this analysis**

| Location                            | Mean Latitude (°N) | Mean Longitude (°E) | Median Age Range (CE) | N   | References                          |
|-------------------------------------|--------------------|---------------------|-----------------------|-----|-------------------------------------|
| <b>Western North Atlantic Ocean</b> |                    |                     |                       |     |                                     |
| Connecticut, USA                    | 41.3               | -71.9               | -1174 to 1981         | 162 | ref. 36, 42, 62, 73, 85–87          |
| Florida, USA                        | 30.6               | -81.7               | -559 to 1999          | 65  | ref. 61                             |
| Greenland                           | 65.7               | -51.0               | 1328 to 1950          | 44  | ref. 68                             |
| Louisiana, USA                      | 29.9               | -91.8               | 448 to 1807           | 23  | ref. 55                             |
| Massachusetts, USA                  | 42.2               | -70.8               | -1440 to 1963         | 39  | ref. 5, 44, 45, 75, 83              |
| New Jersey, USA                     | 39.3               | -74.6               | -476 to 2000          | 151 | ref. 36, 41, 43, 58, 60, 72, 74, 82 |
| North Carolina, USA                 | 35.6               | -75.9               | -1694 to 2000         | 180 | ref. 5, 36, 57, 79                  |
| Nova Scotia, Canada                 | 44.7               | -63.3               | -836 to 1996          | 78  | ref. 47, 77                         |
| <b>Eastern North Atlantic Ocean</b> |                    |                     |                       |     |                                     |
| Brittany, France                    | 48.3               | -4.3                | -872 to 1467          | 7   | ref. 80                             |
| Denmark                             | 55.6               | -8.3                | -808 to 1881          | 22  | ref. 48, 84                         |
| Iceland                             | 64.8               | -22.4               | -141 to 2002          | 93  | ref. 49, 76                         |
| Isle of Wight, UK                   | 50.7               | -1.4                | -517 to 2011          | 26  | ref. 66, 67, 69                     |
| Scotland, UK                        | 58.4               | -4.8                | -198 to 2009          | 108 | ref. 34, 38, 78                     |
| South West England, UK              | 50.3               | -3.9                | -482 to 1448          | 11  | ref. 51, 53                         |
| Spain                               | 43.4               | -2.9                | -1075 to 2003         | 52  | ref. 46, 63–65                      |
| <b>South Atlantic Ocean</b>         |                    |                     |                       |     |                                     |
| Rio de Janeiro, Brazil              | -23.0              | -43.5               | -1302 to 1388         | 16  | ref. 40, 59, 71                     |
| Santa Catarina, Brazil              | -28.5              | -48.8               | -688 to 1834          | 20  | ref. 33                             |
| South Africa                        | -33.7              | 26.7                | -1197 to 2010         | 41  | ref. 35, 37, 39, 70, 81             |
| <b>Mediterranean Sea</b>            |                    |                     |                       |     |                                     |
| Israel                              | 32.5               | 34.9                | -10 to 1132           | 65  | ref. 7                              |
| <b>Pacific Ocean</b>                |                    |                     |                       |     |                                     |
| Christmas Island, Kiribati          | 2.0                | -157.5              | -1050 to 1860         | 72  | ref. 8, 89                          |
| Cook Islands                        | -20.2              | -159.8              | 363 to 1900           | 12  | ref. 56                             |
| New Zealand                         | -46.5              | 169.7               | -299 to 1991          | 15  | ref. 50, 54                         |
| Tasmania, Australia                 | -42.3              | 147.9               | 1820 to 2004          | 28  | ref. 52                             |
| <b>Indian Ocean</b>                 |                    |                     |                       |     |                                     |
| Seychelles                          | -4.7               | 55.5                | -646 to 1442          | 10  | ref. 88                             |

Mean latitude, mean longitude and the range of median data point age estimates are shown for the N individual data points from each site.

**Dataset S1b. Tide gauges used in this analysis**

| Name                | Latitude (°N) | Longitude (°E) | First Year | Last Year | PSMSL ID |
|---------------------|---------------|----------------|------------|-----------|----------|
| AMSTERDAM           | 52.37         | 4.90           | 1700       | 1925      | —        |
| KRONSTADT           | 59.98         | 29.77          | 1777       | 1993      | —        |
| STOCKHOLM           | 59.32         | 18.08          | 1774       | 2000      | —        |
| BREST               | 48.38         | -4.49          | 1807       | 2013      | 1        |
| SWINOUJSCIE         | 53.92         | 14.23          | 1811       | 1999      | 2        |
| SHEERNESS           | 51.45         | 0.74           | 1833       | 2006      | 3        |
| CUXHAVEN 2          | 53.87         | 8.72           | 1843       | 2010      | 7        |
| WISMAR 2            | 53.90         | 11.46          | 1849       | 2012      | 8        |
| MAASSLUIS           | 51.92         | 4.25           | 1848       | 2013      | 9        |
| SAN FRANCISCO       | 37.81         | -122.47        | 1855       | 2013      | 10       |
| WARNEMUNDE 2        | 54.17         | 12.10          | 1856       | 2012      | 11       |
| NEW YORK            | 40.70         | -74.01         | 1856       | 2013      | 12       |
| LIVERPOOL           | 53.40         | -3.00          | 1858       | 1983      | 15       |
| VLISSINGEN          | 51.44         | 3.60           | 1862       | 2013      | 20       |
| ABERDEEN II         | 57.15         | -2.08          | 1862       | 1965      | 21       |
| HOEK VAN HOLLAND    | 51.98         | 4.12           | 1864       | 2013      | 22       |
| DEN HELDER          | 52.96         | 4.75           | 1865       | 2013      | 23       |
| HARLINGEN           | 53.18         | 5.41           | 1865       | 2013      | 25       |
| IJMUIDEN            | 52.46         | 4.55           | 1872       | 2013      | 32       |
| STAVANGER           | 58.97         | 5.73           | 1919       | 2012      | 47       |
| BERGEN              | 60.40         | 5.32           | 1916       | 2012      | 58       |
| NORTH SHIELDS       | 55.01         | -1.44          | 1896       | 2013      | 95       |
| HALIFAX             | 44.67         | -63.58         | 1896       | 2011      | 96       |
| FERNANDINA BEACH    | 30.67         | -81.47         | 1898       | 2013      | 112      |
| TROIS-RIVIERES      | 46.33         | -72.55         | 1925       | 2013      | 126      |
| PHILADELPHIA        | 39.93         | -75.14         | 1901       | 2013      | 135      |
| DUNEDIN II          | -45.88        | 170.51         | 1900       | 2013      | 136      |
| BALTIMORE           | 39.27         | -76.58         | 1903       | 2013      | 148      |
| GALVESTON II        | 29.31         | -94.79         | 1909       | 2013      | 161      |
| ATLANTIC CITY       | 39.35         | -74.42         | 1912       | 2013      | 180      |
| PORTLAND            | 43.66         | -70.25         | 1912       | 2013      | 183      |
| NEWLYN              | 50.10         | -5.54          | 1916       | 2013      | 202      |
| CHARLESTON I        | 32.78         | -79.92         | 1922       | 2013      | 234      |
| BOSTON              | 42.35         | -71.05         | 1921       | 2013      | 235      |
| WEST-TERSCHELLING   | 53.36         | 5.22           | 1921       | 2013      | 236      |
| PENSACOLA           | 30.40         | -87.21         | 1924       | 2011      | 246      |
| PORT SAID           | 31.25         | 32.30          | 1923       | 1946      | 253      |
| SEWELLS POINT       | 36.95         | -76.33         | 1928       | 2013      | 299      |
| ANNAPOLIS           | 38.98         | -76.48         | 1929       | 2013      | 311      |
| PORTSMOUTH          | 50.80         | -1.11          | 1962       | 2012      | 350      |
| NEWPORT             | 41.51         | -71.33         | 1931       | 2013      | 351      |
| WASHINGTON DC       | 38.87         | -77.02         | 1931       | 2013      | 360      |
| SANDY HOOK          | 40.47         | -74.01         | 1933       | 2013      | 366      |
| WOODS HOLE          | 41.52         | -70.67         | 1933       | 2013      | 367      |
| FORT PULASKI        | 32.03         | -80.90         | 1935       | 2013      | 395      |
| WILMINGTON          | 34.23         | -77.95         | 1936       | 2013      | 396      |
| NEW LONDON          | 41.36         | -72.09         | 1939       | 2013      | 429      |
| EUGENE ISLAND       | 29.37         | -91.39         | 1940       | 1974      | 440      |
| ST JEAN DE LUZ      | 43.40         | -1.68          | 1943       | 2010      | 469      |
| SANTANDER I         | 43.46         | -3.79          | 1944       | 2012      | 485      |
| REYKJAVIK           | 64.15         | -21.94         | 1957       | 2013      | 638      |
| CANANEIA            | -25.02        | -47.93         | 1955       | 2004      | 726      |
| PORT ELIZABETH      | -33.95        | 25.63          | 1980       | 2010      | 820      |
| SIMONS BAY          | -34.19        | 18.44          | 1958       | 2013      | 826      |
| MALIN HEAD          | 55.37         | -7.33          | 1959       | 2001      | 916      |
| KNYSNA              | -34.05        | 23.05          | 1961       | 2013      | 950      |
| DEVONPORT           | 50.37         | -4.19          | 1962       | 2013      | 982      |
| ILHA FISCAL         | -22.90        | -43.17         | 1965       | 2013      | 1032     |
| BRIDGEPORT          | 41.17         | -73.18         | 1965       | 2013      | 1068     |
| WICK                | 58.44         | -3.09          | 1965       | 2012      | 1109     |
| ULLAPOOL            | 57.90         | -5.16          | 1983       | 2013      | 1112     |
| CAPE MAY            | 38.97         | -74.96         | 1966       | 2013      | 1153     |
| SPRING BAY          | -42.55        | 147.93         | 1992       | 2013      | 1216     |
| CHRISTMAS ISLAND II | 1.98          | -157.48        | 1974       | 2010      | 1371     |
| RAROTONGA           | -21.20        | -159.77        | 1978       | 2001      | 1453     |
| DUCK PIER OUTSIDE   | 36.18         | -75.75         | 1985       | 2013      | 1636     |

**Dataset S1c. Hyperparameters under different modeling assumptions**

| Model             | log likelihood | $\sigma_g$<br>(mm) | $\tau_g$<br>(yr) | $\sigma_l$<br>(mm/yr) | $\lambda_l$<br>(°) | $\sigma_m$<br>(mm) | $\tau_m$<br>(yr) | $\lambda_m$<br>(°) | $\sigma_w$<br>(mm) | $\sigma_0$<br>(mm) | $\sigma_{g0}$<br>(mm) |
|-------------------|----------------|--------------------|------------------|-----------------------|--------------------|--------------------|------------------|--------------------|--------------------|--------------------|-----------------------|
| ML <sub>2,1</sub> | -12260         | 57.3               | 100.0            | 1.1                   | 5.5                | 50.9               | —                | 6.4                | 20.9               | 18.1               | 121.1                 |
| ML <sub>2,2</sub> | -12257         | 772.3              | 2004.9           | 0.9                   | 2.7                | 57.0               | 100.0            | 9.0                | 20.9               | 16.6               | 0.2                   |
| ML <sub>1,1</sub> | -12266         | 53.7               | 100.0            | 1.1                   | 5.7                | —                  | —                | 7.0                | 20.8               | 18.2               | 118.5                 |
| NC                | -12255         | 396.9              | 692.3            | 0.9                   | 1.9                | 57.7               | 100.0            | 7.4                | 20.8               | 0.4                | 235.9                 |
| Gr                | -12259         | 165.8              | 311.7            | 1.1                   | 4.9                | 53.1               | 100.0            | 7.1                | 21.0               | 18.1               | 121.2                 |

**Dataset S1d. Prior estimates of rates of GSL change under different modeling assumptions (mm/yr)**

|                | ML <sub>2,1</sub> | ML <sub>2,2</sub> | ML <sub>1,1</sub> | NC          | Gr          |
|----------------|-------------------|-------------------|-------------------|-------------|-------------|
| 0–300          | 0.00 ± 0.48       | 0.00 ± 1.03       | 0.00 ± 0.45       | 0.00 ± 1.50 | 0.00 ± 1.04 |
| 300–700        | 0.00 ± 0.40       | 0.00 ± 0.75       | 0.00 ± 0.38       | 0.00 ± 1.24 | 0.00 ± 0.91 |
| 700–1000       | 0.00 ± 0.53       | 0.00 ± 0.70       | 0.00 ± 0.50       | 0.00 ± 1.37 | 0.00 ± 1.09 |
| 1000–1400      | 0.00 ± 0.40       | 0.00 ± 0.75       | 0.00 ± 0.38       | 0.00 ± 1.24 | 0.00 ± 0.91 |
| 1400–1800      | 0.00 ± 0.38       | 0.00 ± 1.03       | 0.00 ± 0.36       | 0.00 ± 1.41 | 0.00 ± 0.92 |
| 1800–1900      | 0.00 ± 1.11       | 0.00 ± 1.26       | 0.00 ± 1.04       | 0.00 ± 1.81 | 0.00 ± 1.48 |
| 1860–1900      | 0.00 ± 1.56       | 0.00 ± 1.29       | 0.00 ± 1.46       | 0.00 ± 1.89 | 0.00 ± 1.65 |
| 1900–2000      | 0.00 ± 1.16       | 0.00 ± 1.28       | 0.00 ± 1.08       | 0.00 ± 1.78 | 0.00 ± 1.47 |
| Amplitude (cm) | ±10 (8–15)        | ±17 (8–37)        | ±11 (8–14)        | ±27 (14–48) | ±20 (12–33) |

Errors are ±2σ. Amplitude row indicates the median (5th–95th percentile) prior estimate of the amplitude of variability over 0–1900 CE.

**Dataset S1e. Posterior estimates of rates of GSL change under different modeling assumptions (mm/yr)**

|                        | ML <sub>2,1</sub>   | ML <sub>2,2</sub>   | ML <sub>1,1</sub>   | NC                  | Gr                  |
|------------------------|---------------------|---------------------|---------------------|---------------------|---------------------|
| 0–300                  | 0.13 ± 0.25 (0.87)  | 0.18 ± 0.21 (0.96)  | 0.14 ± 0.25 (0.88)  | 0.17 ± 0.26 (0.91)  | 0.17 ± 0.25 (0.92)  |
| 300–700                | 0.08 ± 0.20 (0.79)  | 0.04 ± 0.18 (0.68)  | 0.07 ± 0.20 (0.78)  | 0.05 ± 0.21 (0.68)  | 0.06 ± 0.21 (0.71)  |
| 700–1000               | −0.03 ± 0.26 (0.40) | −0.02 ± 0.22 (0.44) | −0.03 ± 0.26 (0.42) | 0.02 ± 0.28 (0.56)  | −0.02 ± 0.27 (0.45) |
| 1000–1400              | −0.23 ± 0.19 (0.01) | −0.17 ± 0.17 (0.02) | −0.23 ± 0.19 (0.01) | −0.25 ± 0.20 (0.01) | −0.24 ± 0.20 (0.01) |
| 1400–1800              | 0.01 ± 0.16 (0.55)  | −0.02 ± 0.14 (0.38) | 0.00 ± 0.17 (0.53)  | 0.01 ± 0.17 (0.55)  | 0.01 ± 0.17 (0.58)  |
| 1800–1900              | −0.03 ± 0.38 (0.45) | 0.40 ± 0.28 (1.00)  | −0.05 ± 0.39 (0.40) | 0.23 ± 0.38 (0.89)  | 0.09 ± 0.39 (0.69)  |
| 1860–1900              | 0.41 ± 0.54 (0.94)  | 0.69 ± 0.32 (1.00)  | 0.40 ± 0.56 (0.93)  | 0.60 ± 0.48 (0.99)  | 0.50 ± 0.51 (0.98)  |
| 1900–2000              | 1.38 ± 0.15 (1.00)  | 1.35 ± 0.13 (1.00)  | 1.37 ± 0.15 (1.00)  | 1.40 ± 0.14 (1.00)  | 1.39 ± 0.14 (1.00)  |
| Amplitude (0–1900; cm) | ±8 (7–11)           | ±6 (4–8)            | ±9 (7–11)           | ±8 (6–10)           | ±8 (6–11)           |

Errors are ±2σ. Parenthetical numbers indicate probability greater than 0–1700 CE average rate. Amplitude row indicates the median (5th–95th percentile) estimate of the amplitude of variability over 0–1900 CE.

**Dataset S1f. Rates of GSL change employing different data subsets (mm/yr; prior ML<sub>2,1</sub>)**

| Subset                     | 0–700          | 700–1000      | 1000–1400       | 1400–1600      | 1600–1800      | 1800–1900     | 1900–2000      |
|----------------------------|----------------|---------------|-----------------|----------------|----------------|---------------|----------------|
| +All+GSL                   | 0.10 ± 0.10**  | −0.03 ± 0.26  | −0.23 ± 0.19*** | 0.29 ± 0.35**  | −0.28 ± 0.31** | −0.03 ± 0.38  | 1.38 ± 0.15*** |
| +All-GSL                   | 0.10 ± 0.10**  | −0.04 ± 0.26  | −0.23 ± 0.19*** | 0.29 ± 0.35**  | −0.25 ± 0.32*  | −0.04 ± 0.40  | 1.31 ± 0.33*** |
| +NWAtlantic+GSL            | −0.00 ± 0.13   | −0.00 ± 0.30  | −0.13 ± 0.21†   | 0.37 ± 0.38**  | −0.21 ± 0.38†  | −0.07 ± 0.53  | 1.37 ± 0.16*** |
| +NWAtlantic-GSL            | −0.00 ± 0.13   | −0.00 ± 0.30  | −0.12 ± 0.21†   | 0.37 ± 0.38**  | −0.20 ± 0.39†  | −0.18 ± 0.58† | 1.48 ± 0.52*** |
| −NWAtlantic+GSL            | 0.19 ± 0.14*** | 0.04 ± 0.37   | −0.29 ± 0.29**  | 0.02 ± 0.54    | −0.34 ± 0.44*  | −0.04 ± 0.47  | 1.37 ± 0.16*** |
| −NWAtlantic-GSL            | 0.18 ± 0.14*** | 0.04 ± 0.37   | −0.29 ± 0.29**  | 0.03 ± 0.54    | −0.26 ± 0.45†  | 0.01 ± 0.49   | 1.01 ± 0.40*** |
| +NEAtlantic+GSL            | 0.16 ± 0.17**  | 0.01 ± 0.45   | −0.16 ± 0.35†   | −0.04 ± 0.65   | −0.48 ± 0.53** | −0.00 ± 0.54  | 1.35 ± 0.16*** |
| +NEAtlantic-GSL            | 0.15 ± 0.17**  | −0.01 ± 0.45  | −0.17 ± 0.35†   | −0.04 ± 0.65   | −0.28 ± 0.54†  | 0.08 ± 0.57   | 0.51 ± 0.54**  |
| −NEAtlantic+GSL            | 0.06 ± 0.11†   | −0.04 ± 0.27  | −0.18 ± 0.20**  | 0.31 ± 0.35**  | −0.19 ± 0.35†  | −0.17 ± 0.48† | 1.39 ± 0.16*** |
| −NEAtlantic-GSL            | 0.06 ± 0.11†   | −0.04 ± 0.27  | −0.18 ± 0.20**  | 0.31 ± 0.35**  | −0.20 ± 0.36†  | −0.28 ± 0.51† | 1.56 ± 0.40*** |
| +NAtlantic+GSL             | 0.06 ± 0.12†   | −0.01 ± 0.28  | −0.19 ± 0.20**  | 0.33 ± 0.37**  | −0.30 ± 0.34** | 0.04 ± 0.41   | 1.36 ± 0.15*** |
| +NAtlantic-GSL             | 0.06 ± 0.12†   | −0.01 ± 0.28  | −0.20 ± 0.20**  | 0.33 ± 0.37**  | −0.23 ± 0.34*  | 0.05 ± 0.43   | 1.18 ± 0.40*** |
| −NAtlantic+GSL             | 0.12 ± 0.15*   | 0.04 ± 0.41   | −0.21 ± 0.31*   | 0.02 ± 0.56    | −0.16 ± 0.53†  | −0.29 ± 0.70† | 1.41 ± 0.17*** |
| −NAtlantic-GSL             | 0.12 ± 0.15*   | 0.04 ± 0.41   | −0.21 ± 0.31*   | 0.02 ± 0.56    | −0.14 ± 0.54†  | −0.30 ± 0.75† | 1.30 ± 0.55*** |
| +SAmerica+GSL              | 0.06 ± 0.20†   | −0.07 ± 0.53  | 0.01 ± 0.40     | 0.01 ± 0.70    | −0.34 ± 0.71†  | −0.31 ± 0.99† | 1.40 ± 0.18*** |
| +SAmerica-GSL              | 0.04 ± 0.20†   | −0.07 ± 0.53  | 0.01 ± 0.40     | −0.01 ± 0.70   | −0.09 ± 0.75   | −0.38 ± 1.07† | 0.67 ± 0.10*   |
| −SAmerica+GSL              | 0.09 ± 0.11**  | −0.02 ± 0.26  | −0.23 ± 0.19*** | 0.30 ± 0.35**  | −0.27 ± 0.31** | −0.01 ± 0.38  | 1.37 ± 0.15*** |
| −SAmerica-GSL              | 0.09 ± 0.11**  | −0.02 ± 0.26  | −0.23 ± 0.19*** | 0.30 ± 0.35**  | −0.24 ± 0.32*  | −0.01 ± 0.40  | 1.26 ± 0.34*** |
| +AtlanticMediterranean+GSL | 0.10 ± 0.11**  | 0.00 ± 0.27   | −0.33 ± 0.21*** | 0.45 ± 0.37*** | −0.26 ± 0.34*  | 0.01 ± 0.42   | 1.35 ± 0.15*** |
| +AtlanticMediterranean-GSL | 0.10 ± 0.11**  | 0.00 ± 0.27   | −0.34 ± 0.21*** | 0.45 ± 0.37*** | −0.19 ± 0.34†  | 0.04 ± 0.44   | 1.11 ± 0.39*** |
| −AtlanticMediterranean+GSL | 0.04 ± 0.17†   | −0.08 ± 0.43† | 0.10 ± 0.29†    | −0.16 ± 0.54†  | −0.27 ± 0.53†  | −0.24 ± 0.67† | 1.41 ± 0.17*** |
| −AtlanticMediterranean-GSL | 0.04 ± 0.17†   | −0.07 ± 0.43† | 0.10 ± 0.29†    | −0.16 ± 0.54†  | −0.27 ± 0.53†  | −0.38 ± 0.70† | 1.58 ± 0.54*** |

†/\*\*/\*\*\* = 67%/90%/95%/99% probability of sign. '†' indicates a data set consisting only of the sites in the named region, '-' a data set consisting of sites except those in the named region. '+GSL' and '-GSL' represent the inclusion or exclusion of the Kalman smoother GMSL curve of ref. 12.

Dataset S1g. Rates of RSL change (mm/yr; prior ML<sub>2,1</sub>)

| Site                                   | 0–1700          | 0–700         | 700–1400       | 1400–1800     | 1800–1900    | 1900–2000      |
|----------------------------------------|-----------------|---------------|----------------|---------------|--------------|----------------|
| Brittany-Arun                          | 0.85 ± 0.14***  | 0.99 ± 0.25*  | 0.65 ± 0.25*   | 0.93 ± 0.35†  | 0.75 ± 0.52  | 1.65 ± 0.49*** |
| Brittany-Tresseny                      | 0.59 ± 0.47***  | 0.73 ± 0.51*  | 0.39 ± 0.52**  | 0.68 ± 0.57†  | 0.50 ± 0.65  | 1.39 ± 0.61*** |
| Christmas Island                       | -0.06 ± 0.07**  | 0.01 ± 0.19†  | -0.10 ± 0.21   | -0.15 ± 0.32† | 0.04 ± 0.94  | 1.19 ± 0.74*** |
| Connecticut-Barn Island                |                 |               | 0.91 ± 0.22    | 1.06 ± 0.20   | 1.09 ± 0.62  | 2.69 ± 0.45    |
| Connecticut-East River Marsh           | 0.97 ± 0.07***  | 1.02 ± 0.15†  | 0.91 ± 0.14†   | 1.04 ± 0.21†  | 1.09 ± 0.61  | 2.73 ± 0.47*** |
| Connecticut-Indian River               | 0.91 ± 0.24***  | 0.96 ± 0.28†  | 0.84 ± 0.27†   | 0.97 ± 0.33†  | 1.08 ± 0.67† | 2.71 ± 0.52*** |
| Cook Islands-Aitutaki                  |                 |               | -0.58 ± 0.24   | -0.54 ± 0.37  | -1.10 ± 0.96 | 1.25 ± 0.87    |
| Cook Islands-Rarotonga                 |                 |               |                | -0.53 ± 0.36  | -1.20 ± 0.90 | 1.23 ± 0.79    |
| Denmark-Ho Bugt                        | 0.52 ± 0.12***  | 0.67 ± 0.24*  | 0.32 ± 0.23**  | 0.60 ± 0.37†  | 0.71 ± 0.89  | 1.43 ± 0.78*** |
| Florida-Nassau                         | 0.40 ± 0.06***  | 0.43 ± 0.15†  | 0.38 ± 0.15    | 0.39 ± 0.27   | 0.49 ± 0.83  | 1.82 ± 0.49*** |
| Greenland-Aasiaat                      |                 |               |                | 0.98 ± 0.33   | 0.46 ± 1.02  | 2.02 ± 1.05    |
| Greenland-Nanortalik                   |                 |               |                |               | 1.31 ± 1.05  | 2.67 ± 1.09    |
| Greenland-Sisimiut                     |                 |               |                | 0.66 ± 0.36   | 0.10 ± 1.03  | 1.67 ± 1.05    |
| Iceland-Vioarholmi                     | 0.65 ± 0.08***  | 0.82 ± 0.20** | 0.47 ± 0.22*   | 0.66 ± 0.35   | 0.89 ± 0.89† | 1.96 ± 0.77*** |
| Isle of Wight-Newtown Estuary          | 0.59 ± 0.33***  | 0.74 ± 0.38*  | 0.38 ± 0.38**  | 0.69 ± 0.49†  | 0.56 ± 0.67  | 1.43 ± 0.61*** |
| Israel-Casesarea                       | -0.01 ± 0.08    | 0.14 ± 0.16** | -0.22 ± 0.20** | 0.01 ± 0.39   | 0.05 ± 1.07  | 1.43 ± 1.03*** |
| Louisiana-Lydia                        |                 |               | 0.60 ± 0.18    | 0.49 ± 0.30   | 0.25 ± 0.96  | 3.41 ± 0.83    |
| Massachusetts-Barnstable               | 1.16 ± 0.26***  | 1.22 ± 0.31†  | 1.07 ± 0.29†   | 1.24 ± 0.36†  | 1.23 ± 0.75  | 2.81 ± 0.57*** |
| Massachusetts-Revere                   | 0.62 ± 0.08***  | 0.69 ± 0.17†  | 0.53 ± 0.15†   | 0.71 ± 0.25†  | 0.69 ± 0.69  | 2.35 ± 0.45*** |
| Massachusetts-Wood Island              | 0.54 ± 0.09***  | 0.61 ± 0.19†  | 0.45 ± 0.13†   | 0.63 ± 0.24†  | 0.64 ± 0.69  | 2.23 ± 0.47*** |
| New Jersey-Cape May Courthouse         | 1.54 ± 0.10***  | 1.64 ± 0.16*  | 1.49 ± 0.17†   | 1.49 ± 0.24†  | 1.78 ± 0.62† | 3.87 ± 0.43*** |
| New Jersey-Cheesquake Marsh            | 1.46 ± 0.33***  | 1.53 ± 0.35*  | 1.38 ± 0.36†   | 1.47 ± 0.42   | 1.72 ± 0.72† | 3.47 ± 0.50*** |
| New Jersey-Leeds Point                 | 1.53 ± 0.06***  | 1.63 ± 0.13** | 1.45 ± 0.13†   | 1.52 ± 0.24   | 1.77 ± 0.63† | 3.76 ± 0.41*** |
| New Zealand-Blueskin Bay               | -0.03 ± 0.21    | 0.10 ± 0.29†  | -0.18 ± 0.30†  | -0.07 ± 0.40  | 0.14 ± 0.90  | 1.47 ± 0.56*** |
| New Zealand-Pounaweia                  |                 |               | 0.20 ± 0.33    | 0.30 ± 0.40   | 0.56 ± 0.84  | 2.08 ± 0.60    |
| North Carolina-Croatan National Forest |                 |               | 0.66 ± 0.30    | 0.45 ± 0.34   | 0.83 ± 0.67  | 2.77 ± 0.57    |
| North Carolina-Hatteras Island         |                 |               |                | 0.99 ± 0.60   | 1.21 ± 0.79  | 3.40 ± 0.76    |
| North Carolina-Sand Point              | 1.12 ± 0.04***  | 1.08 ± 0.10†  | 1.24 ± 0.09*** | 0.99 ± 0.16*  | 1.08 ± 0.50  | 3.33 ± 0.47*** |
| North Carolina-Tump Point              | 1.06 ± 0.08***  | 1.05 ± 0.16   | 1.16 ± 0.15*   | 0.91 ± 0.14** | 1.33 ± 0.48† | 3.47 ± 0.41*** |
| North Carolina-Wilmington              | 0.68 ± 0.17***  | 0.69 ± 0.23   | 0.73 ± 0.22†   | 0.58 ± 0.30†  | 0.90 ± 0.73† | 2.58 ± 0.54*** |
| Nova Scotia-Chezzetcook                | 1.78 ± 0.13***  | 1.87 ± 0.24†  | 1.65 ± 0.23†   | 1.89 ± 0.22†  | 1.66 ± 0.53  | 3.14 ± 0.45*** |
| Rio de Janeiro-Arraial do Cabro        | -0.79 ± 0.28*** | -0.68 ± 0.35† | -0.94 ± 0.35†  | -0.80 ± 0.47  | -0.90 ± 1.08 | 0.90 ± 0.95*** |
| Rio de Janeiro-Buzios                  | -0.66 ± 0.25*** | -0.54 ± 0.33† | -0.80 ± 0.33†  | -0.66 ± 0.45  | -0.76 ± 1.07 | 1.03 ± 0.94*** |
| Rio de Janeiro-Frade                   | -0.63 ± 0.30*** | -0.51 ± 0.37† | -0.77 ± 0.37†  | -0.64 ± 0.48  | -0.73 ± 1.07 | 1.08 ± 0.94*** |
| Rio de Janeiro-Ilha Grande             | -0.87 ± 0.47*** | -0.75 ± 0.53† | -1.02 ± 0.51†  | -0.89 ± 0.60  | -1.03 ± 1.14 | 0.86 ± 1.00*** |
| Rio de Janeiro-Itaipu-Acu              | -0.20 ± 0.16*** | -0.09 ± 0.27† | -0.35 ± 0.27†  | -0.21 ± 0.41  | -0.31 ± 1.04 | 1.53 ± 0.88*** |
| Rio de Janeiro-Mangaratiba             | -0.64 ± 0.24*** | -0.52 ± 0.32† | -0.79 ± 0.32†  | -0.66 ± 0.45  | -0.79 ± 1.06 | 1.09 ± 0.91*** |
| Rio de Janeiro-Parati-Mirim            | -0.85 ± 0.42*** | -0.73 ± 0.47† | -1.00 ± 0.48†  | -0.87 ± 0.57  | -1.02 ± 1.12 | 0.87 ± 0.99*** |
| Rio de Janeiro-Tarituba                | -0.91 ± 0.43*** | -0.79 ± 0.48† | -1.06 ± 0.49†  | -0.93 ± 0.57  | -1.08 ± 1.13 | 0.81 ± 1.00*** |
| Santa Catarina-Cape of Santa Marta     | -0.58 ± 0.24*** | -0.46 ± 0.32† | -0.74 ± 0.32†  | -0.59 ± 0.45  | -0.81 ± 1.10 | 1.00 ± 1.01*** |
| Santa Catarina-Ponta de Itapiruba      | -0.49 ± 0.54**  | -0.37 ± 0.58† | -0.65 ± 0.58†  | -0.51 ± 0.66  | -0.73 ± 1.20 | 1.10 ± 1.10*** |
| Scotland-Kyle of Tongue                |                 |               | -0.36 ± 0.27   | -0.16 ± 0.38  | -0.25 ± 0.85 | 0.83 ± 0.71    |
| Scotland-Loch Laxford                  |                 |               | -0.07 ± 0.25   | 0.13 ± 0.36   | 0.03 ± 0.85  | 1.13 ± 0.71    |
| Scotland-Wick                          | -0.15 ± 0.12*** | 0.01 ± 0.24** | -0.35 ± 0.23** | -0.14 ± 0.36  | -0.22 ± 0.83 | 0.85 ± 0.67*** |
| Seychelles-Barbarons                   | 0.44 ± 0.15***  | 0.54 ± 0.26†  | 0.30 ± 0.26†   | 0.44 ± 0.41   | 0.41 ± 1.11  | 1.81 ± 1.05*** |
| South Africa-Groenvlei                 |                 |               | 0.03 ± 0.36    | 0.36 ± 0.47   | 0.10 ± 1.04  | 1.48 ± 0.85    |
| South Africa-Kariega Estuary           |                 |               | 0.42 ± 0.28    | 0.79 ± 0.37   | 0.49 ± 1.01  | 1.76 ± 0.89    |
| South Africa-Langebaan                 | -0.02 ± 0.16    | 0.12 ± 0.27*  | -0.25 ± 0.25** | 0.08 ± 0.40†  | -0.11 ± 1.05 | 1.31 ± 0.89*** |
| South West England-Thurlestone         | 0.95 ± 0.16***  | 1.10 ± 0.29*  | 0.73 ± 0.23**  | 1.04 ± 0.37†  | 0.93 ± 0.70  | 1.78 ± 0.60*** |
| Spain-Muskiz Estuary                   | 0.92 ± 0.51***  | 1.02 ± 0.55†  | 0.75 ± 0.55*   | 1.00 ± 0.63†  | 0.90 ± 0.98  | 1.87 ± 0.78*** |
| Spain-Urdaibai Estuary                 | 0.52 ± 0.41***  | 0.61 ± 0.44†  | 0.34 ± 0.44*   | 0.60 ± 0.57†  | 0.51 ± 0.82  | 1.45 ± 0.70*** |
| Tasmania-Little Swanport               |                 |               |                |               | 0.98 ± 1.19  | 1.88 ± 0.76    |

†/\*\*/\*\*\* = 67%/90%/95%/99% probability of sign (for 0–1700 CE) or of being distinct from the 0–1700 CE rate. Rates not shown when there are no observations within 0.5 degrees of a site. Probabilities not shown where no observations within 0.5 degrees of a site predate 0 CE.

**Dataset S1h. Probability observed GSL rise since 1900 CE exceeded counterfactual projection**

| Year | Scenario 1<br>calibrated against: |                         | Scenario 2<br>calibrated against: |                         |
|------|-----------------------------------|-------------------------|-----------------------------------|-------------------------|
|      | Mann et al. (ref. 1)              | Marcott et al. (ref. 2) | Mann et al. (ref. 1)              | Marcott et al. (ref. 2) |
| 1910 | 0.77                              | 0.37                    | 0.02                              | 0.02                    |
| 1920 | 0.94                              | 0.51                    | 0.13                              | 0.11                    |
| 1930 | 1.00                              | 0.72                    | 0.60                              | 0.54                    |
| 1940 | 1.00                              | 0.88                    | 0.96                              | 0.94                    |
| 1950 | 1.00                              | 0.95                    | 1.00                              | 1.00                    |
| 1960 | 1.00                              | 0.98                    | 1.00                              | 1.00                    |
| 1970 | 1.00                              | 0.99                    | 1.00                              | 1.00                    |
| 1980 | 1.00                              | 0.99                    | 1.00                              | 1.00                    |
| 1990 | 1.00                              | 1.00                    | 1.00                              | 1.00                    |

**Dataset S1i. Semi-empirical projections of 21st century sea-level rise with different calibrations (cm)**

|         | 50 | 17-83   | 5-95   | 50 | 17-83                | 5-95   | 50 | 17-83                   | 5-95   |
|---------|----|---------|--------|----|----------------------|--------|----|-------------------------|--------|
|         |    | Summary |        |    | Mann et al. (ref. 1) |        |    | Marcott et al. (ref. 2) |        |
| RCP 2.6 | 38 | 28-51   | 24-61  | 38 | 29-50                | 25-59  | 38 | 28-51                   | 24-61  |
| RCP 4.5 | 51 | 39-69   | 33-85  | 51 | 39-66                | 34-81  | 52 | 39-69                   | 33-85  |
| RCP 8.5 | 76 | 59-105  | 51-131 | 75 | 59-99                | 52-121 | 78 | 60-105                  | 52-131 |

Values with respect to year 2000 baseline. Results across the three temperature calibration sets show median of medians, minimum of 5th percentiles, and maximum of 95th percentiles.

**Dataset S1j. Prior and posterior distributions  $P(\Psi)$  for the parameters  $\Psi$**

| Parameter               | Prior                                                                     | Mann et al. (ref. 1) | Marcott et al. (ref. 2) |
|-------------------------|---------------------------------------------------------------------------|----------------------|-------------------------|
| $a$                     | $U(0, 20)$ mm/yr/K                                                        | 4.0 (3.2, 5.4)       | 4.7 (3.4, 7.0)          |
| $c(500 \text{ CE})$     | $U(-10, 10)$ mm/yr                                                        | 0.22 (0.10, 0.42)    | 0.05 (0.02, 0.08)       |
| $c(2000 \text{ CE})$    | $U(-2, 2)$ mm/yr                                                          | 0.14 (0.05, 0.29)    | 0.03 (0.01, 0.06)       |
| $T_0(-2000 \text{ CE})$ | $\langle T(-2000 \text{ to } -1800 \text{ CE}) \rangle + U(-0.6, 0.6)$    | 0.25 (-0.19, 0.89)   | 0.03 (-0.42, 0.60)      |
| $T_0(500 \text{ CE})$   | $\mathcal{N}(\langle T(500 - 700 \text{ CE}) \rangle, (0.2 \text{ K})^2)$ | 0.17 (0.11, 0.23)    | -0.09 (-0.17, -0.01)    |
| $T_0(2000 \text{ CE})$  |                                                                           | -0.05 (-0.12, 0.07)  | 0.04 (-0.10, 0.16)      |
| $\tau$                  | $\log U(30, 300)$ yrs                                                     | 174 (87, 366)        | 102 (64, 203)           |
| $\tau_c$                | $\log U(1000, 20000)$ yrs                                                 | 4175 (1140, 17670)   | 3392 (1124, 16155)      |

$\mathcal{N}(\mu, \sigma^2)$  denotes a normal distribution around  $\mu$  with the standard deviation  $\sigma$ .  $U(x_1, x_2)$  is a uniform distribution between  $x_1$  and  $x_2$ . Ranges shown for posteriors are 5th-95th percentiles. Temperatures are relative to the 1850-2000 CE average.
